# Supplementary material
Source: MDPI journal article supplement (https://www.mdpi.com/2227-7080/6/3/63)
Supplement: s1 [file s1]

## Supporting Information

### Detection of Odorant Molecules in the Gaseous Phase Using $\alpha$ -, $\beta$ -, and $\gamma$ -Cyclodextrin Films on a Quartz Crystal Microbalance

Kai Sasaki<sup>1,2</sup>, Hiroyuki Furusawa<sup>2,3,\*</sup>, Kuniaki Nagamine<sup>1,2</sup>, Shizuo Tokito<sup>1,2,\*</sup>

<sup>1</sup> Graduate School of Organic Materials Science, Yamagata University, 4-3-16 Jonan, Yonezawa, Yamagata 992-8510, Japan

<sup>2</sup> Research Center for Organic Electronics, Yamagata University, 4-3-16 Jonan, Yonezawa, Yamagata 992-8510, Japan

<sup>3</sup> Innovative Flex Course for Frontier Organic Material Systems (iFront), Graduate School of Science and Engineering, Yamagata University, 4-3-16 Jonan, Yonezawa, Yamagata 992-8510, Japan

\* Corresponding author

Postal Address: 4-3-16 Jonan, Yonezawa, Yamagata 992-8510, Japan

Phone: +81-238-26-3841

E-mail address: (H. F.) hfurusaw@yz.yamagata-u.ac.jp, (S. T.) tokito@yz.yamagata-u.ac.jp

**Table S1.** Amount of ethyl butyrate captured on each cyclodextrin (CD) film when it was used more than 47 times. <sup>\*1</sup>

|                    | $-\Delta F$ (Hz) <sup>*2</sup> |                           |                            |
|--------------------|--------------------------------|---------------------------|----------------------------|
|                    | $\alpha$ -CD <sup>*3</sup>     | $\beta$ -CD <sup>*3</sup> | $\gamma$ -CD <sup>*3</sup> |
| Run 8              | 20                             | 89                        | 51                         |
| Run 38             | 18                             | 97                        | 37                         |
| Run 47             | 19                             | 91                        | 35                         |
| Average            | 19                             | 92                        | 41                         |
| Standard deviation | $\pm 1$                        | $\pm 4$                   | $\pm 9$                    |

<sup>\*1</sup> The CD films were used for more than one month.

<sup>\*2</sup> The odorant-molecule concentration was 0.13 mmol L<sup>-1</sup>.

<sup>\*3</sup> The same CD films listed in Table 1 were used.

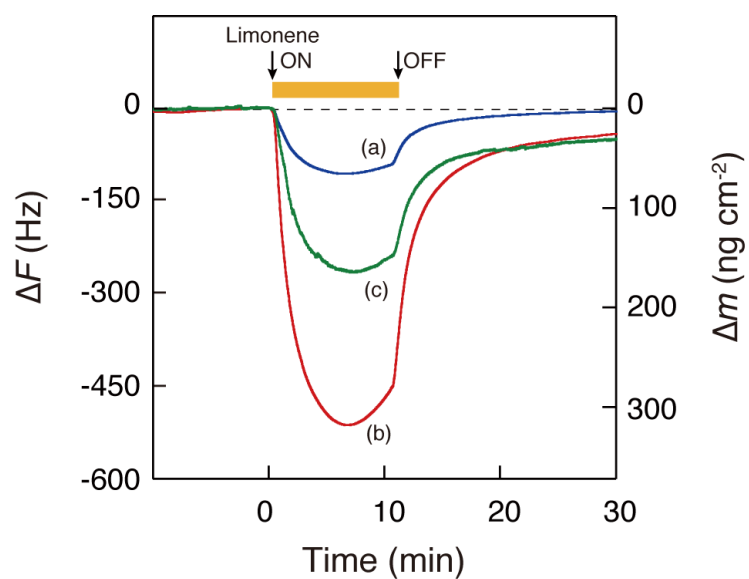

**Figure S1.** Time courses of the frequency change ( $\Delta F$ ) for QCM plates modified with (a)  $\alpha$ -, (b)  $\beta$ -, and (c)  $\gamma$ -CD films in response to a flow of 0.66 mmol L<sup>-1</sup> vaporized limonene in dry air at a flow rate of 0.1 L min<sup>-1</sup> for 10 min, indicated by the orange bar at 25 °C.
