# Supplementary material
Source: MDPI journal article supplement (https://www.mdpi.com/2227-7080/6/3/63)
Supplement: s1 [file s1]

Archive with 1 entries (1 files):
- technologies-322431-supplementary.pdf
